# Supplementary material
Source: Springer Nature journal article supplement (https://www.springermedizin.de/resource/supplementary/13019_2012_710_MOESM1_ESM.pdf/9639394)

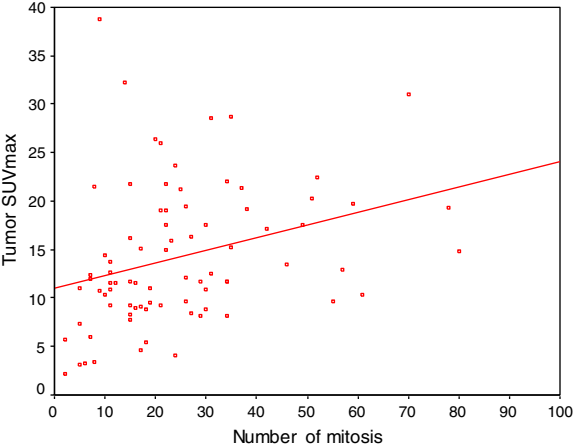

Supplement: MOESM1 [file 9639394]
